# Supplementary material
Source: PubMed Central journal article supplement (PMC8080226)
Supplement: jama-e213816-s001.pdf [file jama-e213816-s001.pdf]

## Supplemental Online Content

Rosenstein MG, Chang S-C, Sakowski C, et al. Hospital quality improvement interventions, statewide policy initiatives, and rates of cesarean delivery for nulliparous, term, singleton, vertex births in California. *JAMA*. doi:10.1001/jama.2021.3816

**eFigure 1.** Schematic of stepped-wedge analysis and nulliparous, term, singleton, vertex (NTSV) cesarean delivery rates

**eFigure 2.** Nulliparous, term, singleton, vertex (NTSV) cesarean delivery rates (with 95% CI) at hospitals in California, Jan 2015 – June 2019, grouped by participation and eligibility status to join the Supporting Vaginal Birth collaborative

**eTable 1.** Distribution of maternal characteristics comparing women who delivered in 2015 at hospitals that participated in the collaborative, those who delivered at hospitals that declined participation, and those who delivered at hospitals that were ineligible for participation

**eTable 2.** Analysis of collaborative activities and statewide actions and nulliparous, term, singleton, vertex (NTSV) cesarean rates in California, Jan 2015 – June 2019

This supplemental material has been provided by the authors to give readers additional information about their work.

**eFigure 1.** Schematic of stepped-wedge analysis and nulliparous, term, singleton, vertex (NTSV) cesarean delivery rates

Legend: In order to account for the fact that different cohorts of the Supporting Vaginal Birth Collaborative began at different times, a modified stepped-wedge design was used to classify births as belonging to the baseline (including baseline time periods for participating hospitals and all time periods for hospitals that did not participate), intervention (time when hospitals were participating in the collaborative), or sustainment phases (the time following the collaborative participation). Deliveries were analyzed in 6-month time blocks.

| Supporting Vaginal Birth Collaborative Participation Status               | Time Period       |                   |                   |                       |                       |                       |                       |                       |                       |
|---------------------------------------------------------------------------|-------------------|-------------------|-------------------|-----------------------|-----------------------|-----------------------|-----------------------|-----------------------|-----------------------|
|                                                                           | 2015 Jan to Jun   | 2015 Jul to Dec   | 2016 Jan to Jun   | 2016 Jul to Dec       | 2017 Jan to Jun       | 2017 Jul to Dec       | 2018 Jan to Jun       | 2018 Jun to Dec       | 2019 Jan to Jun       |
| <b>Round 1 (N=24 hospitals)</b>                                           | Baseline<br>27.8% | Baseline<br>28.5% | Baseline<br>28.7% | Intervention<br>24.8% | Intervention<br>25.7% | Intervention<br>24.1% | Sustainment<br>25.0%  | Sustainment<br>24.5%  | Sustainment<br>24.2%  |
| <b>Round 2 (N=42 hospitals)</b>                                           | Baseline<br>28.4% | Baseline<br>28.6% | Baseline<br>27.2% | Baseline<br>26.3%     | Intervention<br>24.3% | Intervention<br>24.3% | Intervention<br>24.1% | Sustainment<br>24.0%  | Sustainment<br>23.3%  |
| <b>Round 3 (N=25 hospitals)</b>                                           | Baseline<br>29.8% | Baseline<br>30.4% | Baseline<br>28.8% | Baseline<br>28.3%     | Baseline<br>28.9%     | Baseline<br>27.3%     | Intervention<br>27.3% | Intervention<br>25.1% | Intervention<br>25.7% |
| <b>Collaborative non-participants (baseline&gt;23.9%, N=58 hospitals)</b> | Baseline<br>27.0% | Baseline<br>27.7% | Baseline<br>27.4% | Baseline<br>25.8%     | Baseline<br>26.4%     | Baseline<br>25.8%     | Baseline<br>25.2%     | Baseline<br>24.6%     | Baseline<br>24.3%*    |
| <b>Collaborative ineligible (baseline≤23.9%, N=89 hospitals)</b>          | Baseline<br>20.5% | Baseline<br>20.8% | Baseline<br>21.0% | Baseline<br>21.3%     | Baseline<br>21.3%     | Baseline<br>21.2%     | Baseline<br>21.1%     | Baseline<br>20.5%     | Baseline<br>20.8%†    |

\*2019 preliminary data available for 43/58 non-participating hospitals.

†2019 preliminary data available for 78/89 Collaborative ineligible hospitals.

**eFigure 2.** Nulliparous, term, singleton, vertex (NTSV) cesarean delivery rates (with 95% CI) at hospitals in California, Jan 2015 – June 2019, grouped by participation and eligibility status to join the Supporting Vaginal Birth collaborative

Start dates for each collaborative cohort are noted.

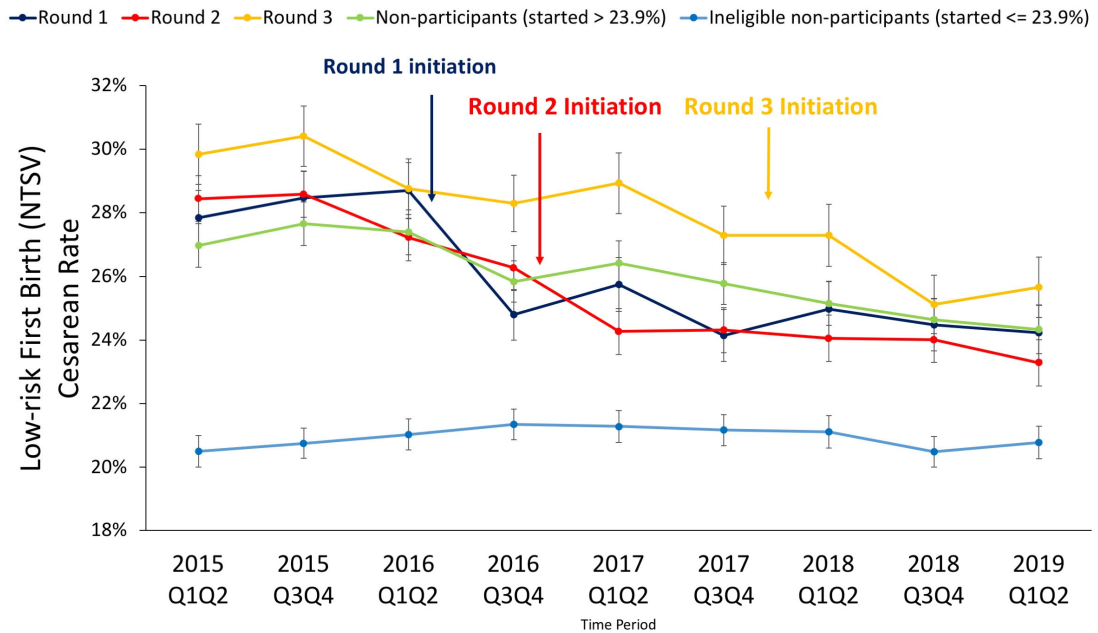

**eTable 1.** Distribution of maternal characteristics comparing women who delivered in 2015 at hospitals that participated in the collaborative, those who delivered at hospitals that declined participation, and those who delivered at hospitals that were ineligible for participation

|                                 | <b>Collaborative participants</b> | <b>Collaborative Non-participants (baseline&gt;23.9%)</b> | <b>Collaborative ineligible (baseline≤23.9%)</b> |
|---------------------------------|-----------------------------------|-----------------------------------------------------------|--------------------------------------------------|
|                                 | <b>N=69,751</b>                   | <b>N=32,550</b>                                           | <b>N=53,604</b>                                  |
| <b>Maternal Characteristics</b> | <b>N (%)</b>                      | <b>N (%)</b>                                              | <b>N (%)</b>                                     |
| <b>Age at Delivery</b>          |                                   |                                                           |                                                  |
| < 18                            | 2,043 (2.9)                       | 1,317 (4.0)                                               | 1,894 (3.5)                                      |
| 18-25                           | 23,770 (34.1)                     | 13,452 (41.3)                                             | 21,774 (40.6)                                    |
| 26-35                           | 36,470 (52.3)                     | 15,335 (47.1)                                             | 25,526 (47.6)                                    |
| >=36                            | 7,468 (10.7)                      | 2,446 (7.5)                                               | 4,410 (8.2)                                      |
| <b>Race Ethnicity</b>           |                                   |                                                           |                                                  |
| White                           | 23,675 (34.9)                     | 7,730 (24.3)                                              | 17,717 (33.9)                                    |
| Black                           | 3,342 (4.9)                       | 1,131 (3.6)                                               | 3,593 (6.9)                                      |
| Asian                           | 12,958 (19.1)                     | 6,675 (21.0)                                              | 7,983 (15.3)                                     |
| Latina                          | 27,379 (40.3)                     | 16,083 (50.5)                                             | 22,391 (42.9)                                    |
| Others                          | 504 (0.7)                         | 217 (0.7)                                                 | 554 (1.1)                                        |
| Missing                         | 1,893                             | 714                                                       | 1,366                                            |
| <b>Pre-Pregnancy BMI</b>        |                                   |                                                           |                                                  |
| < 18.5                          | 2,113 (3.1)                       | 984 (3.2)                                                 | 1,330 (2.6)                                      |
| 18.5-25                         | 35,484 (52.5)                     | 15,073 (48.5)                                             | 23,351 (44.8)                                    |
| 25-30                           | 17,547 (25.9)                     | 8,425 (27.1)                                              | 15,014 (28.8)                                    |
| 30-35                           | 7,597 (11.2)                      | 3,826 (12.3)                                              | 7,157 (13.7)                                     |
| 35-40                           | 3,023 (4.5)                       | 1,732 (5.6)                                               | 3,123 (6.0)                                      |
| >=40                            | 1,886 (2.8)                       | 1,016 (3.3)                                               | 2,143 (4.1)                                      |
| Missing                         | 2,101                             | 1,494                                                     | 1,486                                            |
| <b>Education</b>                |                                   |                                                           |                                                  |
| Some high school or less        | 6,176 (9.3)                       | 3,601 (11.6)                                              | 5,300 (10.3)                                     |
| High school/GED                 | 14,024 (21.1)                     | 8,261 (26.7)                                              | 13,841 (27.0)                                    |
| Some college                    | 16,985 (25.6)                     | 8,915 (28.8)                                              | 14,958 (29.2)                                    |
| College grad or more            | 29,186 (44.0)                     | 10,199 (32.9)                                             | 17,128 (33.4)                                    |
| Missing                         | 3,380                             | 1,574                                                     | 2,377                                            |

**eTable 2.** Analysis of collaborative activities and statewide actions and nulliparous, term, singleton, vertex (NTSV) cesarean rates in California, Jan 2015 – June 2019

|                                      | Model 1 <sup>a</sup><br>aOR (95% CI) | Model 2 <sup>b</sup><br>aOR (95% CI) |
|--------------------------------------|--------------------------------------|--------------------------------------|
| Collaborative Activities             |                                      |                                      |
| Intervention/Sustainment vs Baseline | 0.88 (0.87, 0.90)                    | 0.88 (0.86, 0.90)                    |
| Non-Collaborative Statewide Actions  |                                      |                                      |
| 2016 vs. 2015                        | 0.97 (0.96, 0.99)                    | 0.95 (0.94, 0.97)                    |
| 2017 vs. 2015                        | 0.96 (0.94, 0.98)                    | 0.91 (0.90, 0.93)                    |
| 2018 vs. 2015                        | 0.94 (0.92, 0.96)                    | 0.86 (0.85, 0.88)                    |
| 2019 Q1Q2 vs. 2015                   | 0.92 (0.90, 0.95)                    | 0.83 (0.81, 0.85)                    |

<sup>a</sup>Model 1: Stepped-wedge analysis including collaborative participation (yes/no), time periods (a total of 8 binary variables representing each of the half-year time blocks), and hospital at delivery as a random intercept. Collaborative participation and time periods were coded according to the schemes shown in supplementary Figure 1.

<sup>b</sup>Model 2: Include all potential confounders listed in supplementary Table 1 and 2.
